# Supplementary material for: Dihydrolevoglucosenone (Cyrene™), a new possibility of an environmentally compatible solvent in synthetic organic electrochemistry
Source: Royal Society of Chemistry journal article supplement (doi:10.1039/d3fd00064h), 2023-01-01
Supplement: d3fd00064h1.pdf [file d3fd00064h1.pdf]

## Supporting Information

### Dihydrolevoglucosenone (Cyrene<sup>®</sup>), a new possibility of environmentally compatible solvent in synthetic organic electrochemistry

José Manuel Ramos-Villaseñor, Jessica Sotelo-Gil, Sandra E. Rodil and Bernardo A. Frontana-Uribe\*

Centro Conjunto de Investigación en Química Sustentable, UAEM-UNAM, Toluca, 50200, Estado de México, México  
Instituto de Química, Universidad Nacional Autónoma de México, Circuito Exterior, Ciudad Universitaria, Coyoacán, 04510, CDMX, México.

Instituto de Química, Universidad Nacional Autónoma de México, Circuito Exterior, Ciudad Universitaria, Coyoacán, 04510, CDMX, México.

E-mail: [bafrontu@unam.mx](mailto:bafrontu@unam.mx)

#### 1. Cyclic Voltammograms

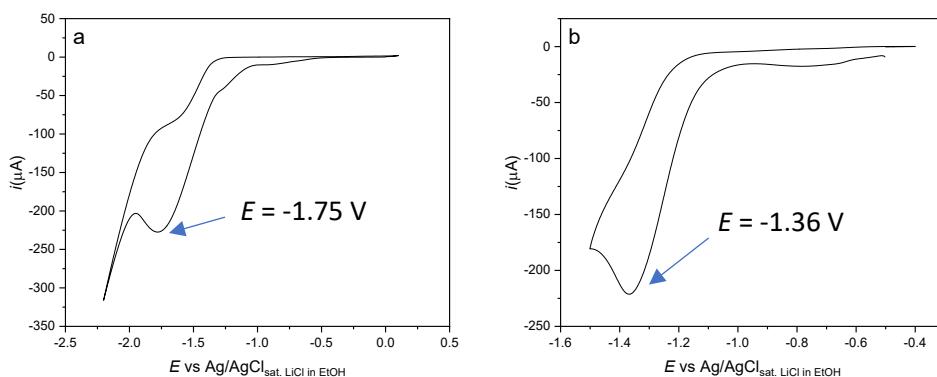

**Figure S.1** Cyclic voltammograms of benzophenone  $5 \times 10^{-3}$  M, W: Glassy Carbon (diameter, 3 mm), C: Pt wire,  $\text{Ag}/\text{AgCl}$  sat.  $\text{LiCl}$  in  $\text{EtOH}$  as reference electrode, scan rate 100 mV/s, a) supporting electrolyte:  $\text{Bu}_4\text{NBF}_4$  0.15 M in  $\text{DLG}/\text{EtOH}$  (1:1), b) supporting electrolyte:  $\text{LiClO}_4$  0.15 M in  $\text{DLG}/\text{EtOH}$  (1:2).

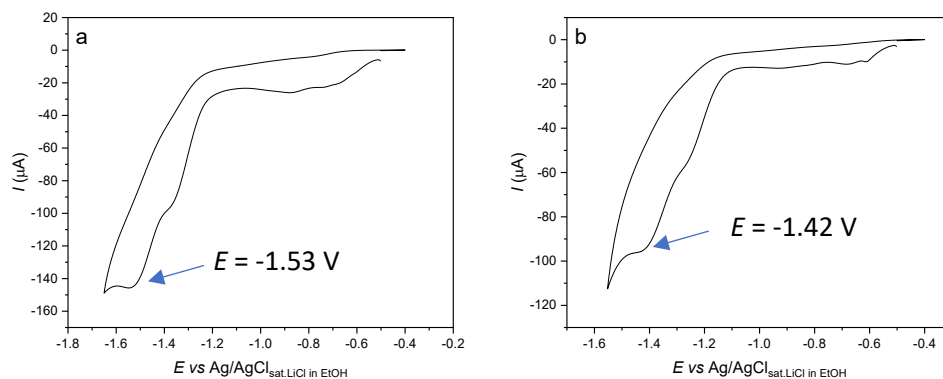

**Figure S.2** Cyclic voltammograms of (4-methoxyphenyl)(phenyl)methanone  $4 \times 10^{-3}$  M, WE: Glassy Carbon (diameter, 3mm), CE: Pt wire, RE: Ag/AgCl sat. LiCl in EtOH as reference electrode, scan rate 100 mV/s, a) supporting electrolyte:  $\text{Bu}_4\text{NBF}_4$  0.15 M in DLG/EtOH (1:1), b) supporting electrolyte:  $\text{LiClO}_4$  0.15 M in DLG/EtOH (1:2).

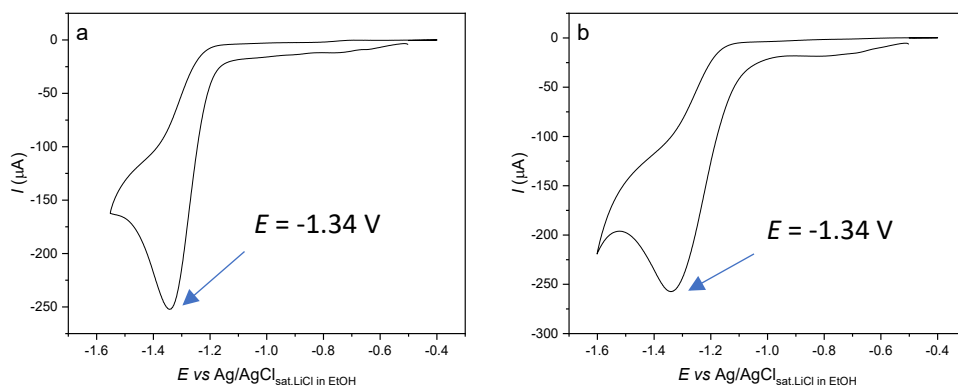

**Figure S.3** Cyclic voltammograms of (4-bromophenyl)(phenyl)methanone  $5 \times 10^{-3}$  M, WE: Glassy Carbon (diameter, 3mm), CE: Pt wire, RE: Ag/AgCl sat. LiCl in EtOH as reference electrode, scan rate 100 mV/s, a) supporting electrolyte:  $\text{Bu}_4\text{NBF}_4$  0.15 M in DLG/EtOH (1:1), b) supporting electrolyte:  $\text{LiClO}_4$  0.15 M in DLG/EtOH (1:2).

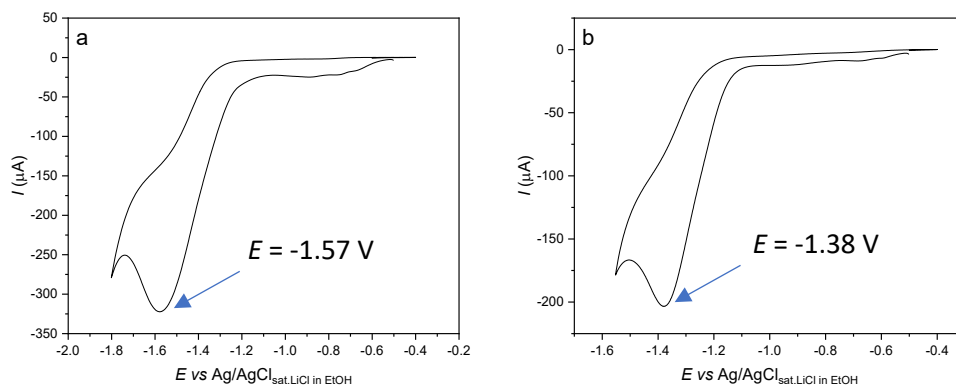

**Figure S.4** Cyclic voltammograms of 2-Methylbenzoilbenzoate  $5 \times 10^{-3}$  M, WE: Glassy Carbon (diameter, 3mm), CE: Pt wire, RE: Ag/AgCl sat. LiCl in EtOH as reference electrode, scan rate 100 mV/s, a) supporting electrolyte:  $\text{Bu}_4\text{NBF}_4$  0.15 M in DGL/EtOH (1:1), b) supporting electrolyte:  $\text{LiClO}_4$  0.15 M in DGL/EtOH (1:2).

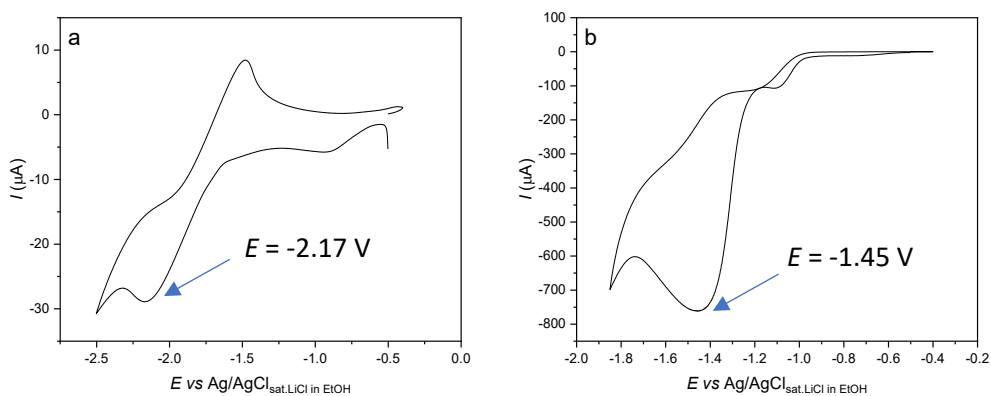

**Figure S.5** a) Cyclic voltammogram of benzoilferrocene  $5 \times 10^{-3}$  M, supporting electrolyte:  $\text{Bu}_4\text{NBF}_4$  0.15 M in 2-MeTHF, b) supporting electrolyte:  $\text{LiClO}_4$  0.15 M in DLG/EtOH (1:2) WE: Glassy Carbon (diameter, 3mm), CE: Pt wire, RE: Ag/AgCl sat. LiCl in EtOH as reference electrode, scan rate 100 mV/s.

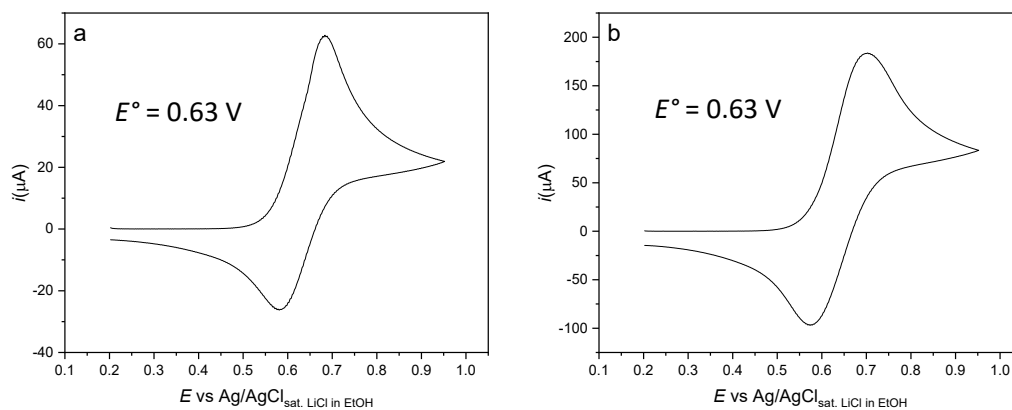

**Figure S.6** Cyclic voltammograms of Ferrocene  $5 \times 10^{-3}$  M, WE: Glassy Carbon (diameter, 3mm), CE: Pt wire, RE: Ag/AgCl sat. LiCl in EtOH as reference electrode, scan rate 100 mV/s, a) supporting electrolyte:  $\text{Bu}_4\text{NBF}_4$  0.15 M in DLG/EtOH (1:1), b) supporting electrolyte:  $\text{LiClO}_4$  0.15 M in DLG/EtOH (1:2).
